# Supplementary material for: Tetranitro- and tetraamino-dibenzo[18]crown-6-ether derivatives: complexes for alkali metal ions, redox potentials, crystal structures, molecular sorption, and proton conducting behaviours
Source: Royal Society of Chemistry journal article supplement (doi:10.1039/d2ce00582d), 2022-01-01
Supplement: d2ce00582d1.pdf [file d2ce00582d1.pdf]

## Supporting Information

### Tetranitro- and Tetraamino- dibenzo[18]crown-6-ether Derivatives: Complexes for Alkali Metal Ions, Redox Potentials, Crystal Structures, Molecular Sorption, and Proton Conducting Behaviours

Yuta Shimizu,<sup>a</sup> Takashi Takeda,<sup>a, b\*</sup> Norihisa Hoshino,<sup>a, b</sup> and Tomoyuki Akutagawa <sup>a, b\*</sup>

<sup>a</sup>Graduate School of Engineering, Tohoku University, Sendai 980-8579, Japan and <sup>b</sup>Institute of Multidisciplinary Research for Advanced Materials (IMRAM), Tohoku University, 2-1-1 Katahira, Aoba-ku, Sendai 980-8577, Japan.

Institute of Multidisciplinary Research for Advanced Materials (IMRAM), Tohoku University, 2-1-1 Katahira, Aoba-ku, Sendai 980-8577, Japan

Phone: +81-22-217-5653

Fax: +81-22-217-5655

E-mail [akutagawa@tohoku.ac.jp](mailto:akutagawa@tohoku.ac.jp)

## Contents

1. Experimental section
2. CV charts of **1** (Figures S1 and S2).
3. UV-vis spectra of **1** and **2** in DMSO (Figures S3 and S4).
4. Time-dependent UV-vis spectra of **2** in DMSO (Figure S5).
5. HOMO levels for the protonation of OPD and **2** (Figure S6).
6. TG and PXRD of thermally annealed **1** (Figure S7).
7. Unit cell of [Na(**1**)I]•2CH<sub>3</sub>CN (Figure S8).
8. One-dimensional array of [K(**1**)I]•3CH<sub>3</sub>CN (Figure S9).
9. Crystal structure of [Rb(**1**)I]•CH<sub>3</sub>CN (Figure S10).
10. One-dimensional coordination array of [Cs(**1**)I] (Figure S11).
11. TG charts of **2**, [Na(**2**)(H<sub>2</sub>SO<sub>4</sub>)<sub>3</sub>]•nH<sub>2</sub>O, and [K(**2**)(H<sub>2</sub>SO<sub>4</sub>)<sub>3</sub>]•nH<sub>2</sub>O (Figure S12).
12. HSO<sub>4</sub><sup>-</sup> arrangements in [Na(**2**)(H<sub>2</sub>SO<sub>4</sub>)<sub>3</sub>]•nH<sub>2</sub>O (Figure S13).
13. *T*- and *f*-dependent dielectric responses and proton-conducting behavior of [(Na<sup>+</sup>)<sub>0.25</sub>(H<sub>3</sub>O<sup>+</sup>)<sub>0.5</sub>(H<sub>2</sub>**2**<sup>+</sup>)(HSO<sub>4</sub><sup>-</sup>)<sub>2.75</sub>(H<sub>2</sub>SO<sub>4</sub>)<sub>0.25</sub>]•6H<sub>2</sub>O (Figure S14).
14. *T*- and *f*-dependent dielectric responses and proton-conducting behavior of dehydrated [(Na<sup>+</sup>)<sub>0.25</sub>(H<sub>3</sub>O<sup>+</sup>)<sub>0.5</sub>(H<sub>2</sub>**2**<sup>+</sup>)•(HSO<sub>4</sub><sup>-</sup>)<sub>2.75</sub>(H<sub>2</sub>SO<sub>4</sub>)<sub>0.25</sub>] (Figure S15).
15. *T*- and *f*-dependent dielectric responses and proton-conducting behavior of [K<sup>+</sup>(H<sub>2</sub>**2**<sup>+</sup>)(HSO<sub>4</sub><sup>-</sup>)<sub>3</sub>]•4H<sub>2</sub>O (Figure S16).
16. *T*- and *f*-dependent dielectric responses and proton-conducting behavior of dehydrated [K<sup>+</sup>(H<sub>2</sub>**2**<sup>+</sup>)(HSO<sub>4</sub><sup>-</sup>)<sub>3</sub>] (Figure S17).

## Experimental section

### Physical measurements.

UV-vis-NIR and IR spectra were recorded using PerkinElmer Lambda 750 and Thermo Fisher Scientific Nicolet 6700 FT-IR spectrophotometers, respectively. Thermogravimetric (TG) analysis and differential scanning calorimetry (DSC) analysis were conducted using a Rigaku Thermo plus TG8120 thermal analysis station and a Mettler DSC1-T with an Al<sub>2</sub>O<sub>3</sub> reference and a heating and cooling rate of 5 K min<sup>-1</sup> under a nitrogen atmosphere. The *T*-dependent dielectric constants were measured using the two-probe AC impedance method from 100 Hz to 1 MHz (Hewlett-Packard, HP4194A) and the temperature controller of a Linkam LTS-E350 system. The electrical contacts were prepared using gold paste (Tokuriki 8560) to attach 25- $\mu\text{m}$   $\phi$  gold wires to the 3-mm  $\phi$  compressed pellet, as well as 10- $\mu\text{m}$   $\phi$  gold wires to each single crystal.

### Preparation.

Crown ethers **1** and **2** were prepared using the methods stated in the literature.<sup>59</sup> Yellow-colored single-crystals of **1**·2CH<sub>3</sub>CN were obtained via the slow evaporation of the crystallization solvent of CH<sub>3</sub>CN; this was obtained using **1** (9.80 mg, 18.1  $\mu\text{mol}$ ) and LiI (3.65 mg, 27.3  $\mu\text{mol}$ ) in boiling CH<sub>3</sub>CN (3 mL). White-needle single-crystals of **2**·0.33H<sub>2</sub>O were obtained by the recrystallization of **2** from boiling CH<sub>3</sub>OH in the presence of hydrated hydrazine.

Orange-colored block-shaped single-crystals of [Na(**1**)I]·3CH<sub>3</sub>CN were obtained via the slow evaporation of CH<sub>3</sub>CN (10 mL) dissolved in **1** (23.5 mg, 43.4  $\mu\text{mol}$ ) and NaI (20.7 mg, 138  $\mu\text{mol}$ ). Yellow-colored block-shaped single-crystals of [K(**1**)I]·4CH<sub>3</sub>CN were obtained via the slow evaporation of the crystallized CH<sub>3</sub>CN (10 mL) dissolved in **1** (20.6 mg, 38.1  $\mu\text{mol}$ ) and KI (20.2 mg, 122  $\mu\text{mol}$ ). Yellow-colored block-shaped single-crystals of [Rb(**1**)I]·3CH<sub>3</sub>CN were obtained via the slow evaporation of boiling CH<sub>3</sub>CN (10 mL) dissolved in **1** (20.3 mg, 37.6  $\mu\text{mol}$ ) and RbI (29.2 mg, 138  $\mu\text{mol}$ ). Yellow-colored block-shaped single-crystals of (Cs<sup>+</sup>·**1**)·I<sup>-</sup> were prepared via slow evaporation of boiling CH<sub>3</sub>CN (10 mL) dissolved in **1** (20.2 mg, 37.4  $\mu\text{mol}$ ) and CsI (20.6 mg, 79.4  $\mu\text{mol}$ ).

Red needle-shaped single-crystals of  $[\text{Na}(\mathbf{2})(\text{H}_2\text{SO}_4)_3] \cdot n\text{H}_2\text{O}$  were prepared by mixing **2** (20.5 mg, 48.8  $\mu\text{mol}$ ) and NaI (24.4 mg, 163  $\mu\text{mol}$ ) in dilute  $\text{H}_2\text{SO}_4$  (1.64 M, 6 mL); the solution was subjected to two-phase diffusion at 281 K using  $\text{CH}_3\text{OH}$ . Red needle-shaped single-crystals of  $[\text{K}(\mathbf{2})(\text{H}_2\text{SO}_4)_3] \cdot n\text{H}_2\text{O}$  were obtained by mixing **2** (69.9 mg, 166  $\mu\text{mol}$ ) and KI (75.1 mg, 452  $\mu\text{mol}$ ) in a dilute  $\text{H}_2\text{SO}_4$  solution (1.64 mol/L, 20 mL), which was placed in the two-phase diffusion crystallization environment of  $\text{CH}_3\text{OH}$  at 281 K. Elemental analysis: Calc. for  $\text{C}_{20}\text{H}_{43}\text{N}_4\text{Na}_{0.25}\text{O}_{22.5}\text{S}_3 \{[(\text{Na}^+)_{0.25}(\mathbf{2})(\text{H}_2\text{SO}_4)_3] \cdot 4.5\text{H}_2\text{O}\}$ : C, 29.97; H, 5.41; N, 6.99. Found: C, 29.88; H, 5.42; N, 6.85. Calc. for  $\text{C}_{20}\text{H}_{48}\text{KN}_4\text{O}_{25}\text{S}_3 \{[(\text{K}^+)_{0.25}(\mathbf{2})(\text{H}_2\text{SO}_4)_3] \cdot 7\text{H}_2\text{O}\}$ : C, 27.30; H, 5.50; N, 6.37. Found: C, 27.54; H, 5.37; N, 6.38.

#### **Structural determination of crystals.**

Single crystals were obtained using a slow-cooling method. Crystallographic data were collected using a Rigaku RAPID-II diffractometer equipped with a rotating anode fitted with multilayer confocal optics and Cu  $K\alpha$  ( $\lambda = 1.54187 \text{ \AA}$ ) radiation from a graphite monochromator at  $T = 100 \text{ K}$ . Structural refinements were performed using the full-matrix least-squares method on  $F^2$ . Calculations were performed using Crystal Structure software packages. All parameters (except for those of the hydrogen atoms), were refined using anisotropic temperature factors. Table 1 summarizes the crystal data and parameters.

#### **Theoretical calculations.**

Density functional theory (DFT) calculations of **1**, **2**,  $\text{H}_2\mathbf{2}^{2+}$ , and the related molecules were performed using the Gaussian 16 program package. The optimized molecular structures were obtained via DFT calculations based on the B3LYP/6-31G (d, p) basis set.

**Table S1.** Crystal data, data collection, and reduction parameters of **1** and **2**.

| Crystal                                                      | <b>1</b> ·2CH <sub>3</sub> CN                                  | [Na( <b>1</b> )I]·3CH <sub>3</sub> CN                              | [K( <b>1</b> )I]·4CH <sub>3</sub> CN                              | [Rb( <b>1</b> )I]·3CH <sub>3</sub> CN                             |
|--------------------------------------------------------------|----------------------------------------------------------------|--------------------------------------------------------------------|-------------------------------------------------------------------|-------------------------------------------------------------------|
| <i>Formula</i>                                               | C <sub>22</sub> H <sub>23</sub> N <sub>5</sub> O <sub>14</sub> | C <sub>26</sub> H <sub>31</sub> N <sub>7</sub> O <sub>14</sub> NaI | C <sub>26</sub> H <sub>31</sub> N <sub>7</sub> O <sub>14</sub> KI | C <sub>26</sub> H <sub>29</sub> RbIN <sub>7</sub> O <sub>14</sub> |
| <i>Formula weight</i>                                        | 581.45                                                         | 815.46                                                             | 870.61                                                            | 875.93                                                            |
| <i>Space group</i>                                           | <i>Pnma</i> (#62)                                              | <i>Pbca</i> (#61)                                                  | <i>Pca2</i> <sub>1</sub> (#29)                                    | <i>P</i> -1 (#2)                                                  |
| <i>a</i> , Å                                                 | 7.5672(3)                                                      | 17.6971(3)                                                         | 18.5633(3)                                                        | 10.6237(3)                                                        |
| <i>b</i> , Å                                                 | 22.2189(8)                                                     | 18.6927(3)                                                         | 9.31515(17)                                                       | 11.2609(4)                                                        |
| <i>c</i> , Å                                                 | 15.2555(6)                                                     | 20.9582(4)                                                         | 21.2695(4)                                                        | 15.1068(5)                                                        |
| <i>α</i> , deg                                               | –                                                              | –                                                                  | –                                                                 | 88.389(6)                                                         |
| <i>β</i> , deg                                               | –                                                              | –                                                                  | –                                                                 | 82.391(6)                                                         |
| <i>γ</i> , deg                                               | –                                                              | –                                                                  | –                                                                 | 74.364(5)                                                         |
| <i>V</i> , Å <sup>3</sup>                                    | 2564.97(18)                                                    | 6933.1(2)                                                          | 3677.91(12)                                                       | 1725.01(11)                                                       |
| <i>Z</i>                                                     | 4                                                              | 8                                                                  | 4                                                                 | 2                                                                 |
| <i>D</i> <sub>calc</sub> , g·cm <sup>-3</sup>                | 1.511                                                          | 1.562                                                              | 1.572                                                             | 1.686                                                             |
| <i>μ</i> , cm <sup>-1</sup>                                  | 11.131                                                         | 80.387                                                             | 85.157                                                            | 96.568                                                            |
| <i>Reflections measured</i>                                  | 26379                                                          | 73769                                                              | 39737                                                             | 18919                                                             |
| <i>Independent reflections</i>                               | 2407                                                           | 6336                                                               | 6663                                                              | 6167                                                              |
| <i>Reflections used</i>                                      | 2407                                                           | 6336                                                               | 6663                                                              | 6167                                                              |
| <i>R</i> <sub>int</sub>                                      | 0.0726                                                         | 0.1081                                                             | 0.0503                                                            | 0.0961                                                            |
| <i>R</i> <sub>1</sub> <sup>a</sup>                           | 0.0620                                                         | 0.0638                                                             | 0.0506                                                            | 0.0572                                                            |
| <i>R</i> <sub>all</sub>                                      | 0.0926                                                         | 0.0844                                                             | 0.0642                                                            | 0.0707                                                            |
| <i>R</i> <sub>w</sub> ( <i>F</i> <sub>2</sub> ) <sup>a</sup> | 0.2290                                                         | 0.1443                                                             | 0.1469                                                            | 0.0961                                                            |
| <i>GOF</i>                                                   | 0.837                                                          | 1.039                                                              | 1.095                                                             | 1.073                                                             |
| <i>CCDC</i>                                                  | 2168847                                                        | 2168842                                                            | 2168840                                                           | 2168843                                                           |

| Crystal                                                      | [Cs(1)I]                                                          | 2·0.33H <sub>2</sub> O                                           | [Na(2)(H <sub>2</sub> SO <sub>4</sub> ) <sub>3</sub> ·<br>6H <sub>2</sub> O]          | [K(2)(H <sub>2</sub> SO <sub>4</sub> ) <sub>3</sub> ·<br>4(H <sub>2</sub> O)]     |
|--------------------------------------------------------------|-------------------------------------------------------------------|------------------------------------------------------------------|---------------------------------------------------------------------------------------|-----------------------------------------------------------------------------------|
| <i>Chemical formula</i>                                      | C <sub>20</sub> H <sub>20</sub> CsIN <sub>4</sub> O <sub>14</sub> | C <sub>20</sub> H <sub>28</sub> N <sub>4</sub> O <sub>6.33</sub> | C <sub>40</sub> H <sub>80</sub> N <sub>8</sub> Na<br>O <sub>42.5</sub> S <sub>6</sub> | C <sub>20</sub> H <sub>21</sub> KN <sub>4</sub><br>O <sub>22</sub> S <sub>3</sub> |
| <i>Formula weight</i>                                        | 800.21                                                            | 425.74                                                           | 1568.45                                                                               | 796.68                                                                            |
| <i>Space group</i>                                           | <i>P2<sub>1</sub>/n</i> (#14)                                     | <i>P2<sub>1</sub></i> (#4)                                       | <i>Pca2<sub>1</sub></i> (#29)                                                         | <i>Pna2<sub>1</sub></i> (#33)                                                     |
| <i>a</i> , Å                                                 | 9.15319(17)                                                       | 16.8353(4)                                                       | 34.7439(9)                                                                            | 11.1964(2)                                                                        |
| <i>b</i> , Å                                                 | 17.8073(3)                                                        | 8.4802(2)                                                        | 8.1437(2)                                                                             | 16.8470(4)                                                                        |
| <i>c</i> , Å                                                 | 16.9471(3)                                                        | 23.1290(6)                                                       | 23.0281(6)                                                                            | 19.1707(4)                                                                        |
| <i>α</i> , deg                                               | –                                                                 | –                                                                | –                                                                                     | –                                                                                 |
| <i>β</i> , deg                                               | 105.200(7)                                                        | 110.799(8)                                                       | –                                                                                     | –                                                                                 |
| <i>γ</i> , deg                                               | –                                                                 | –                                                                | –                                                                                     | –                                                                                 |
| <i>V</i> , Å <sup>3</sup>                                    | 2665.63(13)                                                       | 3086.9(2)                                                        | 6515.6(3)                                                                             | 3616.10(13)                                                                       |
| <i>Z</i>                                                     | 4                                                                 | 6                                                                | 4                                                                                     | 4                                                                                 |
| <i>D</i> <sub>calc</sub> , g·cm <sup>-3</sup>                | 1.994                                                             | 1.374                                                            | 1.599                                                                                 | 1.463                                                                             |
| <i>μ</i> , cm <sup>-1</sup>                                  | 206.212                                                           | 8.636                                                            | 30.052                                                                                | 36.931                                                                            |
| <i>Reflections measured</i>                                  | 28791                                                             | 34844                                                            | 71878                                                                                 | 40108                                                                             |
| <i>Independent reflections</i>                               | 4823                                                              | 9990                                                             | 11887                                                                                 | 6508                                                                              |
| <i>Reflections used</i>                                      | 4823                                                              | 9990                                                             | 11887                                                                                 | 6508                                                                              |
| <i>R</i> <sub>int</sub>                                      | 0.1501                                                            | 0.0338                                                           | 0.0774                                                                                | 0.0354                                                                            |
| <i>R</i> <sub>1</sub> <sup>a</sup>                           | 0.0554                                                            | 0.0709                                                           | 0.1115                                                                                | 0.0819                                                                            |
| <i>R</i> <sub>all</sub>                                      | 0.0683                                                            | 0.0980                                                           | 0.1533                                                                                | 0.0957                                                                            |
| <i>R</i> <sub>w</sub> ( <i>F</i> <sub>2</sub> ) <sup>a</sup> | 0.1174                                                            | 0.2302                                                           | 0.3417                                                                                | 0.2570                                                                            |
| <i>GOF</i>                                                   | 1.066                                                             | 1.060                                                            | 1.175                                                                                 | 1.047                                                                             |
| <i>CCDC</i>                                                  | 216884                                                            | 2168845                                                          | 2168846                                                                               | 2168844                                                                           |

$$^a R = \sum ||F_o| - |F_c|| / \sum |F_o| \text{ and } R_w = (\sum \omega (|F_o| - |F_c|)^2 / \sum \omega F_o^2)^{1/2}.$$

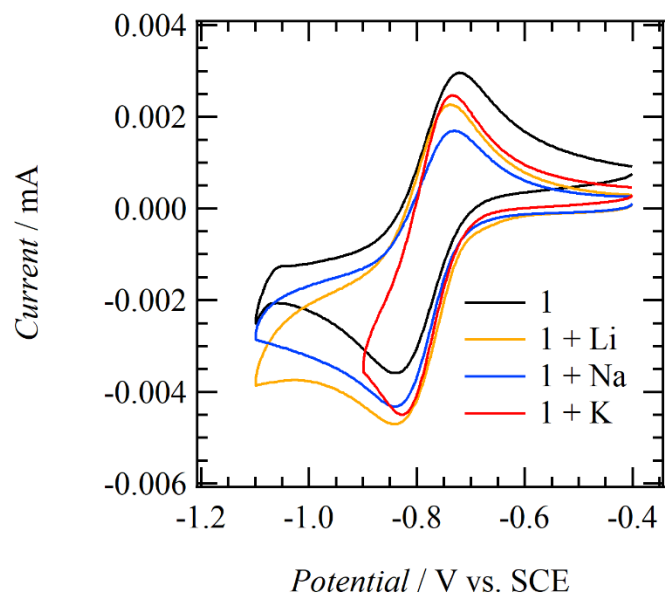

**Figure S1.** CV charts of **1** under the existence of 10 molar  $\text{Li}^+$ ,  $\text{Na}^+$ , and  $\text{K}^+$  in DMSO (WE: GC, CE: Pt, Supporting electrolyte:  $\text{TBABF}_4$  (0.1 M), Sweep speed:  $0.1 \text{ V sec}^{-1}$ ).

**Table S2.** Redox potentials of **1** under the existence of 10 molar  $\text{Li}^+$ ,  $\text{Na}^+$ , and  $\text{K}^+$  in DMSO (WE: GC, CE: Pt, Supporting electrolyte:  $\text{TBABF}_4$  (0.1 M), Sweep speed:  $0.1 \text{ V sec}^{-1}$ ).

|               | $E^{\text{ox}}$ [V] | $E^{\text{red}}$ [V] | $E_{1/2}$ [V] | $\Delta E$ [mV] |
|---------------|---------------------|----------------------|---------------|-----------------|
| Non           | -0.721              | -0.839               | -0.780        | -               |
| $\text{Li}^+$ | -0.738              | -0.844               | -0.791        | -11.0           |
| $\text{Na}^+$ | -0.731              | -0.841               | -0.786        | -6.0            |
| $\text{K}^+$  | -0.734              | -0.827               | -0.781        | -0.5            |

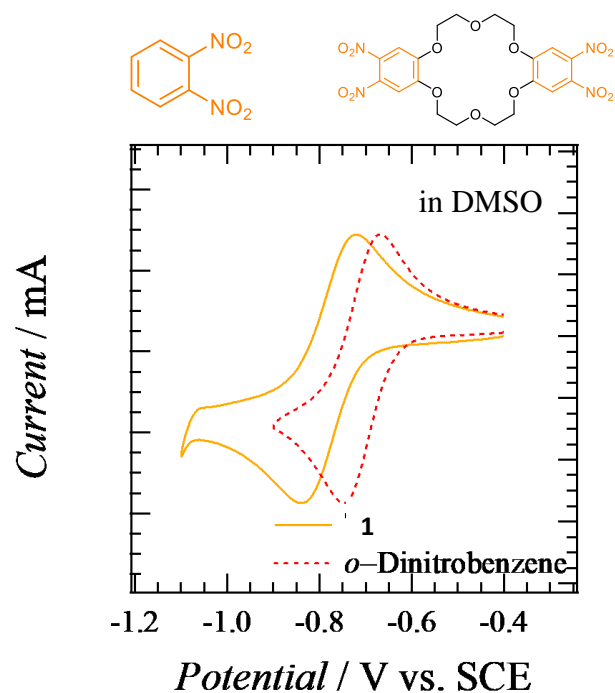

**Figure S2.** CV charts of **1** and *o*-DNB in DMSO (WE: GC, CE: Pt, Supporting electrolyte: TBABF<sub>4</sub> (0.1 M), Sweep speed: 0.1 V sec<sup>-1</sup>).

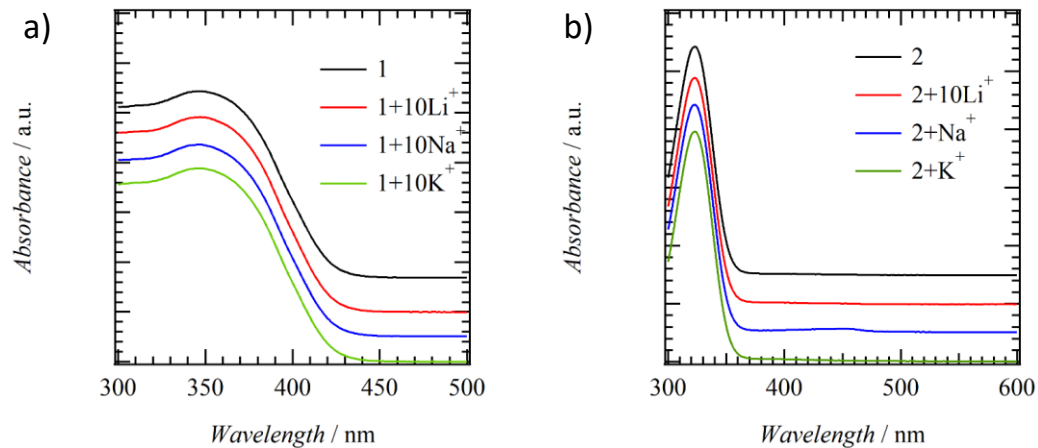

**Figure S3.** UV-vis spectra of **1** and **2** in DMSO by the additions of 10 molar Li<sup>+</sup>, Na<sup>+</sup>, and K<sup>+</sup>. The baselines were shifted to clarify the spectra.



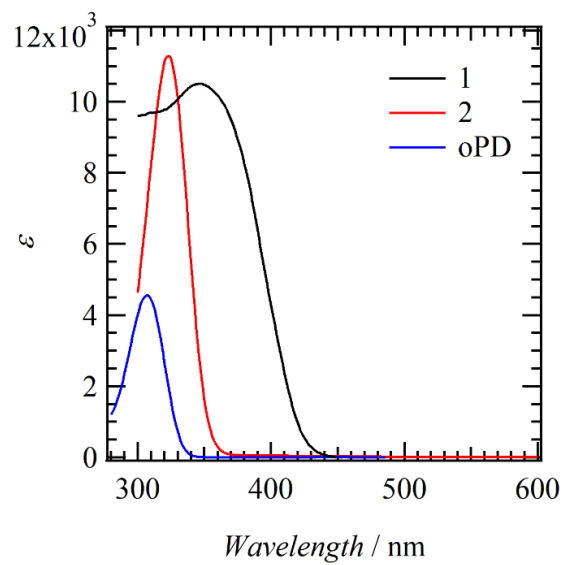

**Figure S4.** UV-vis spectra of **1**, **2**, and OPD in DMSO.

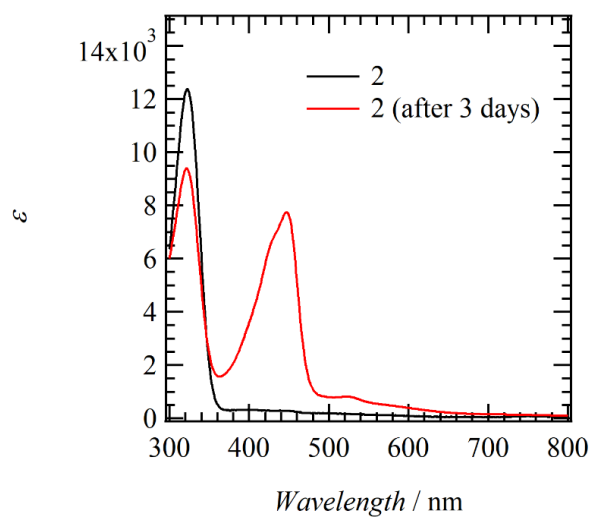

**Figure S5.** Time-dependent UV-vis spectra of **2** in DMSO.

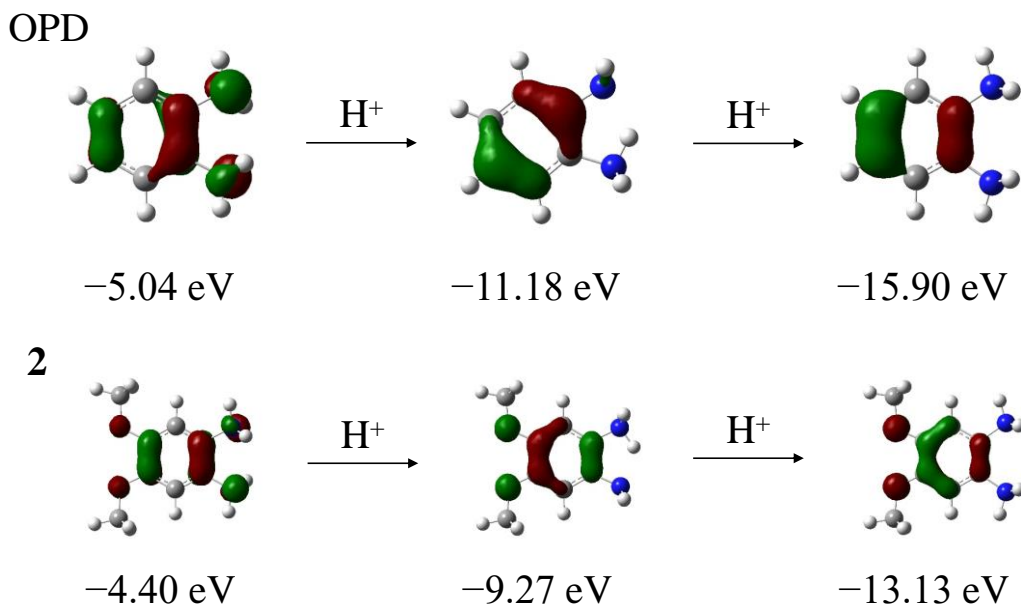

**Figure S6.** Theoretical calculations of HOMO levels for the protonation of OPD  $\rightarrow$  HOPD $^+$   $\rightarrow$  H<sub>2</sub>OPD $^{2+}$  and **2**  $\rightarrow$  H<sub>2</sub> $^+$   $\rightarrow$  H<sub>2</sub>**2** $^{2+}$ .

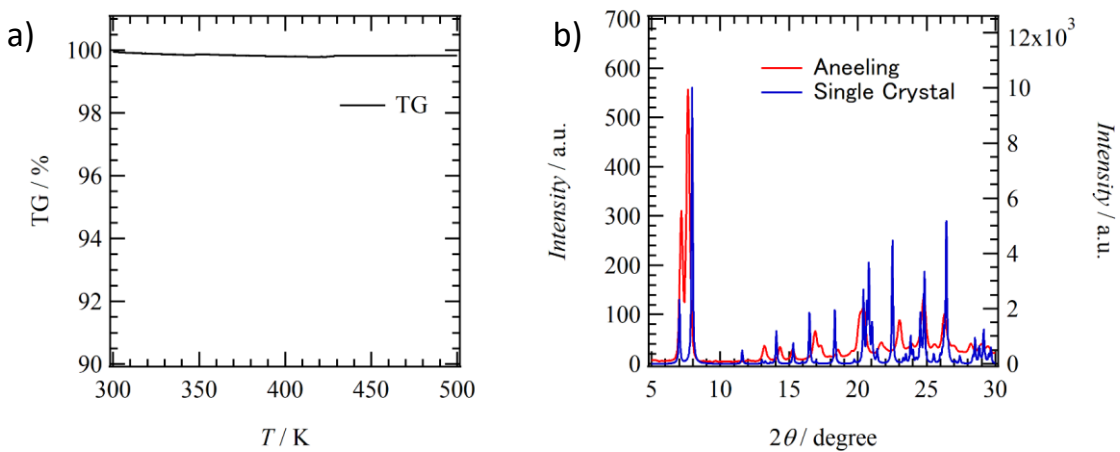

**Figure S7.** Thermally annealed powder sample of **1**. a) TG chart and b) XRD pattern of annealed powder and simulated pattern of single-crystal X-ray analysis at 100 K.

**Table S3.**  $M^+ \sim O$  distances of **M(1)** structures in  $[M(\mathbf{1})] \cdot n\text{CH}_3\text{CN}$  salts. .

| M1~O | M1~O1    | M1~O2    | M1~O3    | M1~O4    | M1~O5    | M1~O6    |
|------|----------|----------|----------|----------|----------|----------|
| Na~O | Na1~O1   | Na1~O2   | Na1~O3   | Na1~O4   | Na1~O5   | Na1~O6   |
|      | 2.737(4) | 2.726(4) | 2.738(4) | 2.694(4) | 2.597(4) | 2.654(4) |
| K~O  | K1~O1    | K1~O2    | K1~O3    | K1~O4    | K1~O5    | K1~O6    |
|      | 2.802(4) | 2.751(4) | 2.844(4) | 2.786(5) | 2.812(4) | 2.865(4) |
| Rb~O | Rb1~O1   | Rb1~O2   | Rb1~O3   | Rb1~O4   | Rb1~O5   | Rb1~O6   |
|      | 3.075(3) | 2.898(3) | 2.955(3) | 3.101(3) | 3.039(4) | 3.048(3) |
| Cs~O | Cs1~O1   | Cs1~O2   | Cs1~O3   | Cs1~O4   | Cs1~O5   | Cs1~O6   |
|      | 3.255(4) | 3.260(5) | 3.167(5) | 3.301(5) | 3.222(6) | 3.208(5) |

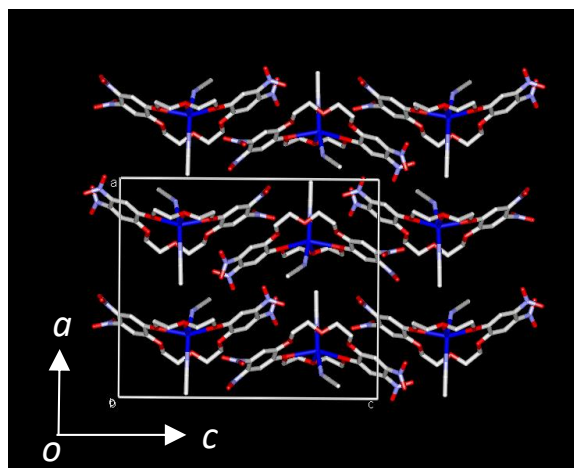

**Figure S8.** Unit cell of  $(\text{Na}^+ \cdot \mathbf{1}) \cdot 2(\text{CH}_3\text{CN})$  viewed along the  $b$ -axis.

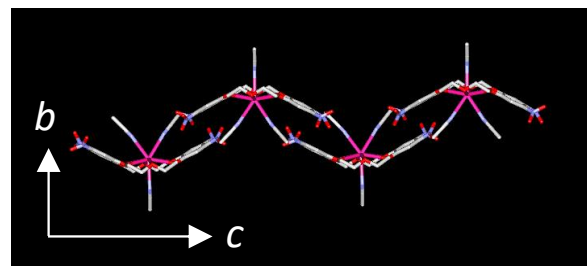

**Figure S9.** One-dimensional array of  $(\text{K}^+ \cdot \mathbf{1}) \cdot 3(\text{CH}_3\text{CN})$  along the  $c$ -axis.

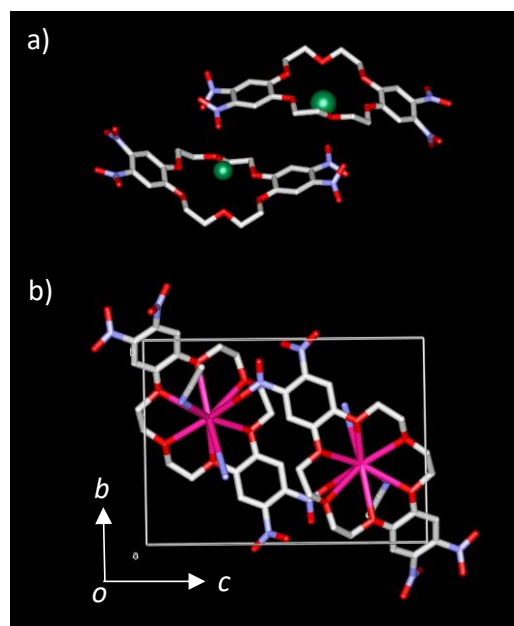

**Figure S10.** Crystal structure of  $(\text{Rb}^+\cdot\mathbf{1})\cdot(\text{CH}_3\text{CN})$ . a) Coordination dimer and the unit cell of  $(\text{Rb}^+\cdot\mathbf{1})\cdot(\text{CH}_3\text{CN})$  viewed along the *a*-axis.

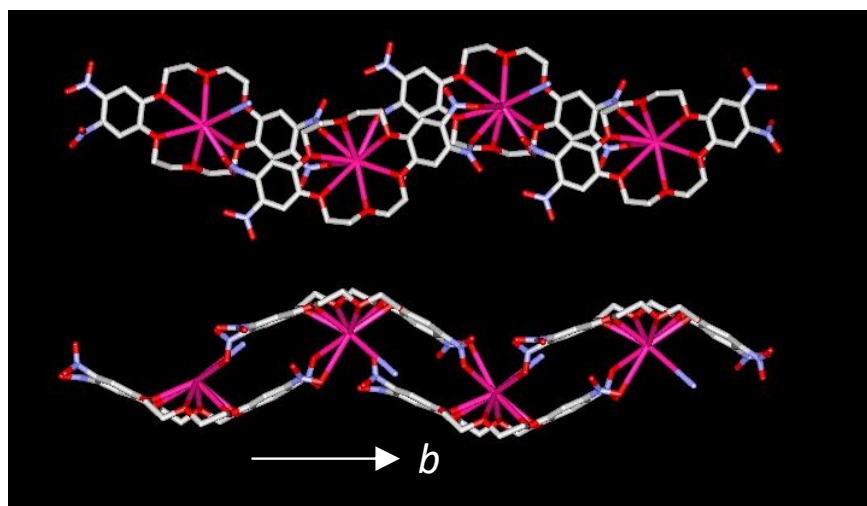

**Figure S11.** One-dimensional coordination array of  $(\text{Cs}^+\cdot\mathbf{1})$  along the *a*-axis.

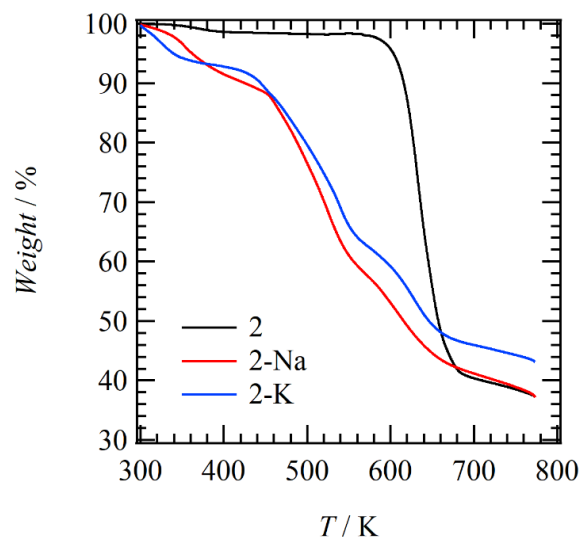

**Figure S12.** TG charts of **2**,  $(\text{Na}^+ \cdot \mathbf{2}) \cdot (\text{HSO}_4^-)_3 \cdot n(\text{H}_2\text{O})$ , and  $(\text{K}^+ \cdot \mathbf{2}) \cdot (\text{HSO}_4^-)_3 \cdot n(\text{H}_2\text{O})$ .

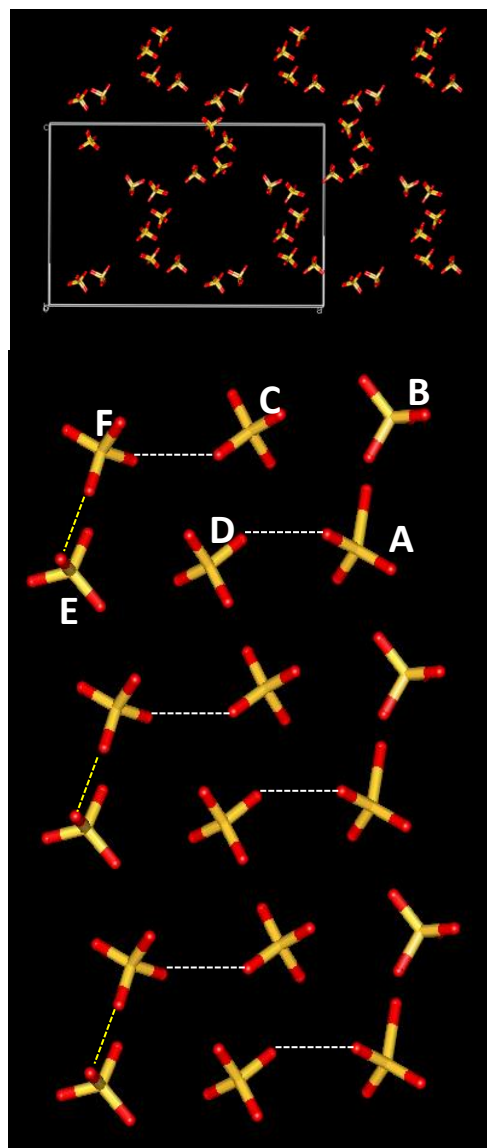

**Figure S13.**  $\text{HSO}_4^-$  arrangements in  $(\text{Na}^+ \cdot 2) \cdot (\text{HSO}_4^-)_3 \cdot n(\text{H}_2\text{O})$ .

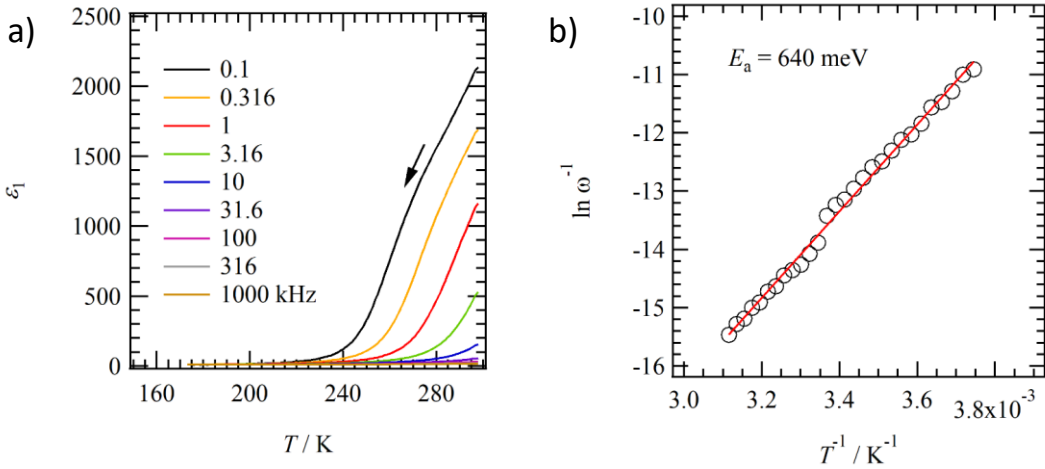

**Figure S14.**  $T$ - and  $f$ -dependent dielectric responses and proton-conducting behavior of  $(\text{Na}^+)_{0.25}(\text{H}_3\text{O}^+)_{0.5}(\text{H}_2\text{2}^{2+}) \cdot (\text{HSO}_4^-)_{2.75}(\text{H}_2\text{SO}_4)_{0.25} \cdot 6(\text{H}_2\text{O})$ . a) The  $\epsilon_1$  responses of the hydrated crystals. b) Arrhenius plots of  $T$ - and  $f$ -dependent  $\epsilon_2$  responses.

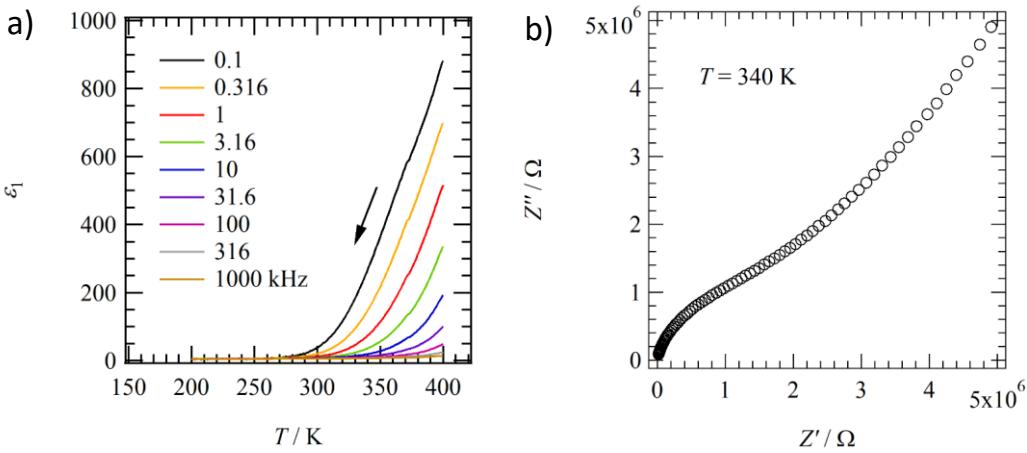

**Figure S15.**  $T$ - and  $f$ -dependent dielectric responses and proton-conducting behavior of dehydrated  $(\text{Na}^+)_{0.25}(\text{H}_3\text{O}^+)_{0.5}(\text{H}_2\text{2}^{2+}) \cdot (\text{HSO}_4^-)_{2.75}(\text{H}_2\text{SO}_4)_{0.25}$ . The  $\epsilon_1$  responses of the dehydrated crystals. b) Cole – Cole plot at 340 K.

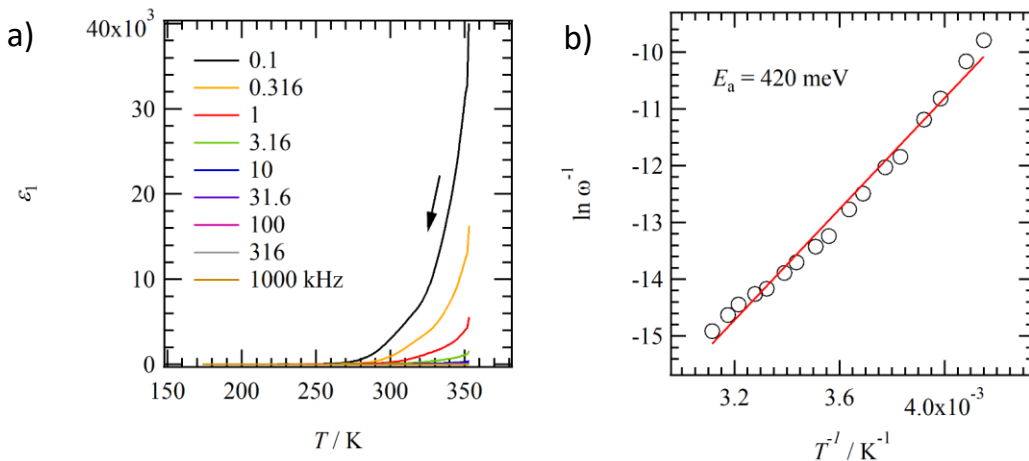

**Figure S16.**  $T$ - and  $f$ -dependent dielectric responses and proton-conducting behavior of  $(K^+ \cdot H_2O) \cdot (HSO_4^-)_3 \cdot 4(H_2O)$ . a) The  $\epsilon_1$  responses of the hydrated crystals. b) Arrhenius plots of  $T$ - and  $f$ -dependent  $\epsilon_2$  responses.

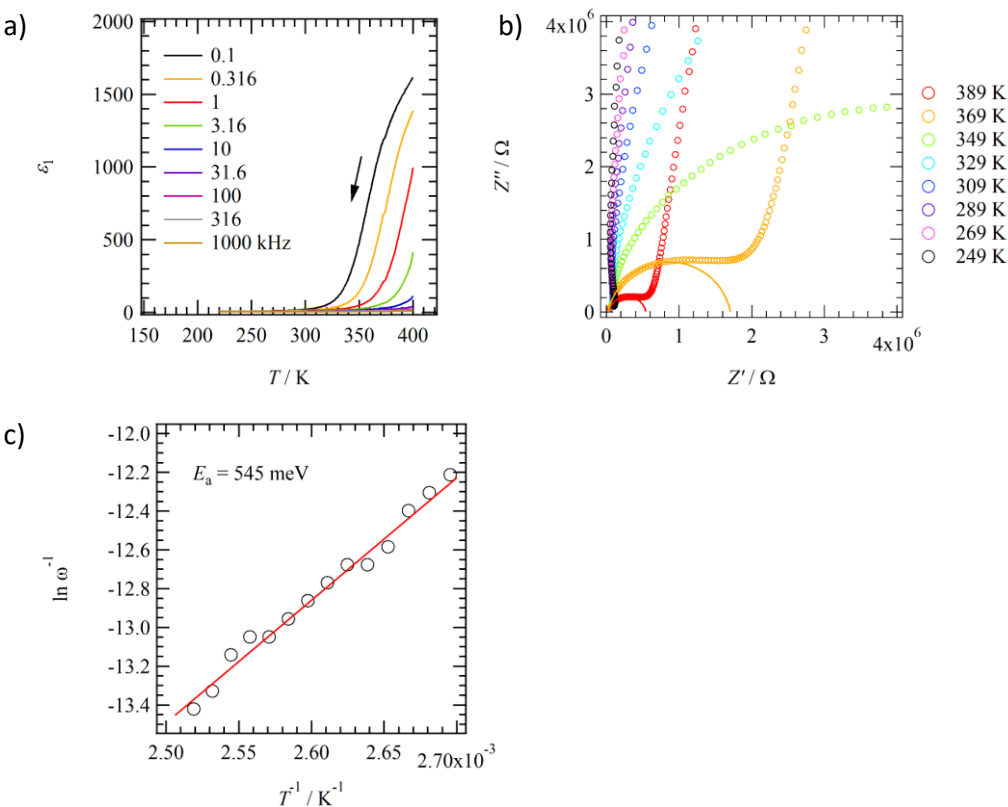

**Figure S17.**  $T$ - and  $f$ -dependent dielectric responses and proton-conducting behavior of dehydrated  $(K^+ \cdot H_2O) \cdot (HSO_4^-)_3 \cdot 4(H_2O)$ . a) The  $\epsilon_1$  responses of the dehydrated crystals. b) Cole – Cole plot at 340 K. c) Arrhenius plots of  $T$ - and  $f$ -dependent  $\epsilon_2$  responses.
